# Supplementary material for: Impact of localized surface plasmon resonance on efficiency of zinc oxide nanowire-based organic–inorganic perovskite solar cells fabricated under ambient conditions
Source: Royal Society of Chemistry journal article supplement (doi:10.1039/d2ra04346g), 2022-01-01
Supplement: d2ra04346g1.pdf [file d2ra04346g1.pdf]

## Supplementary Materials

### **Impact of localized surface plasmon resonance on efficiency of zinc oxide nanowire-based organic-inorganic perovskite solar cells fabricated in ambient conditions**

Md. Mijanur Rahman,<sup>\*ab</sup> Tabassum Hasnat Reshmi,<sup>c</sup> Suhel Ahmed,<sup>c</sup> and Md. Ashrafal Alam,<sup>b</sup>

<sup>a</sup>Department of Nanomaterial Science, Graduate School of Advanced Integration Science, Chiba University, 1-33 Yayoi-Cho, Chiba-Shi, Chiba 263-8522, Japan.

<sup>b</sup>Faculty of Science and Engineering, Iwate University, 4-3-5 Ueda, Morioka, Iwate 020-8551, Japan.

<sup>c</sup>Graduate School of Arts and Sciences, Iwate University, 4-3-5 Ueda, Morioka, Iwate 020-8551, Japan.

\*Corresponding authors:

Md. Mijanur Rahman, Tel/Fax: +81-019-621-6329,

E-mail: mijanur@iwate-u.ac.jp

**Table S1** The optical absorbance and the strongest dipole resonance peak vs. different sizes (Avg. diameter) of NP prepared from different thicknesses of Ag films.

| Film thickness (nm) | NPs average diameter (nm) | Absorbance (-) | Dipole resonance peak wavelength (nm) |
|---------------------|---------------------------|----------------|---------------------------------------|
| 5                   | 24                        | 0.261          | 485                                   |
| 8                   | 38                        | 0.430          | 502                                   |
| 10                  | 52                        | 0.495          | 510                                   |
| <b>12</b>           | <b>61</b>                 | <b>0.536</b>   | <b>512</b>                            |
| 15                  | 72                        | 0.493          | 532                                   |
| 20                  | 95                        | 0.475          | 534                                   |

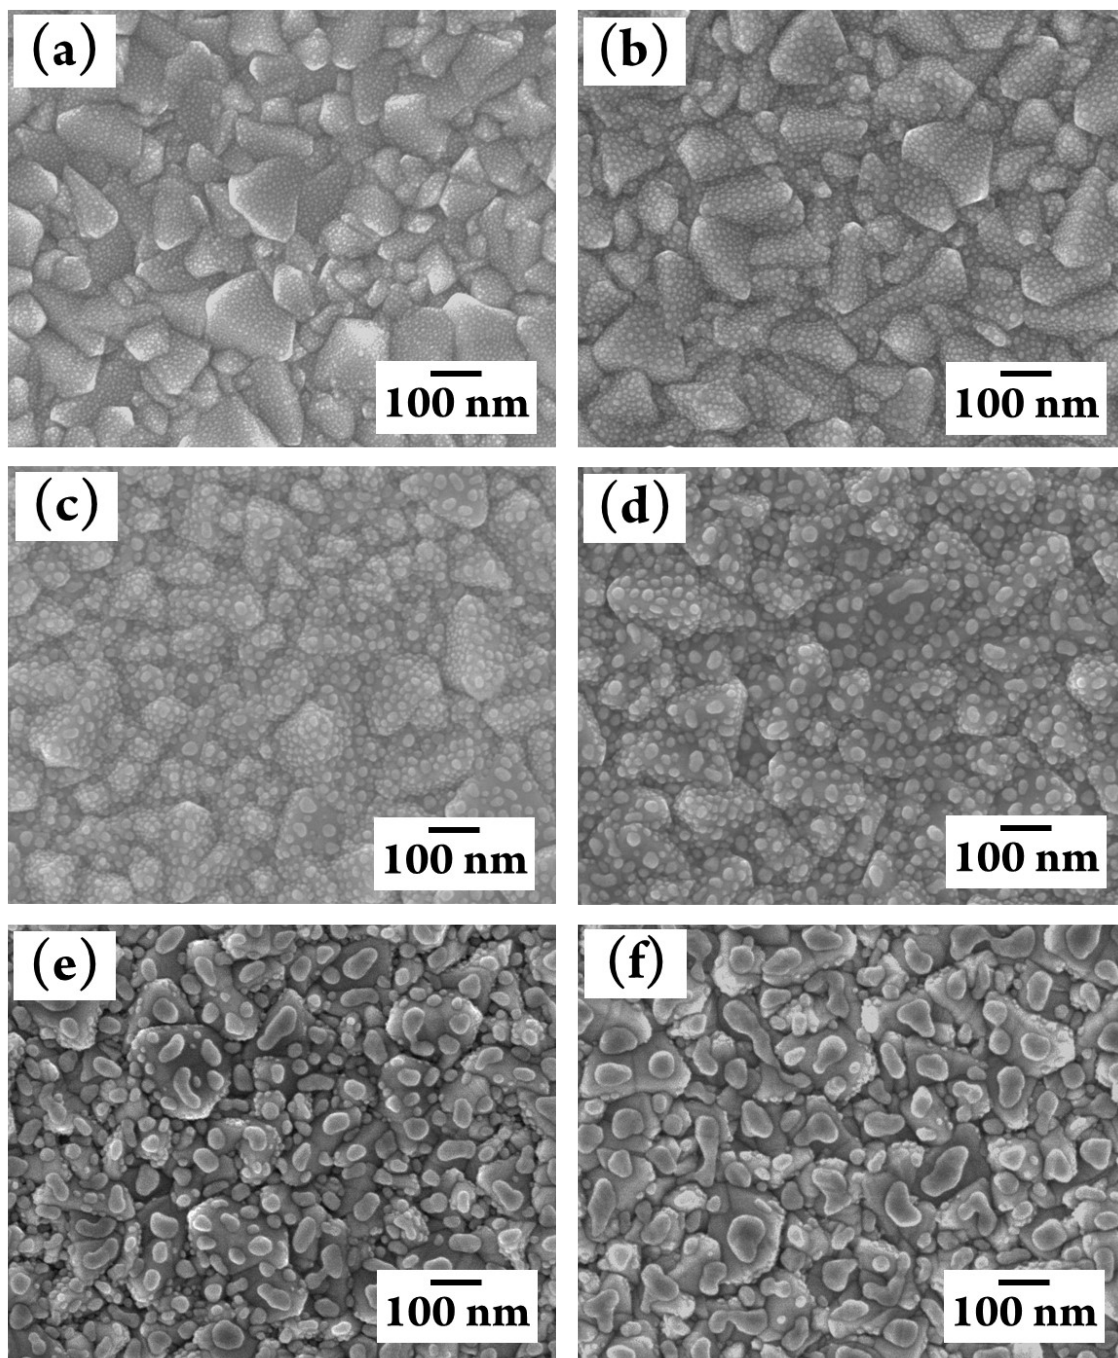

**Fig. S1** FE-SEM images of Ag NPs with an average size of (a) 24 nm, (b) 38 nm, (c) 52 nm, (d) 61 nm, (e) 72 nm, and (f) 95 nm grown on FTO substrate.

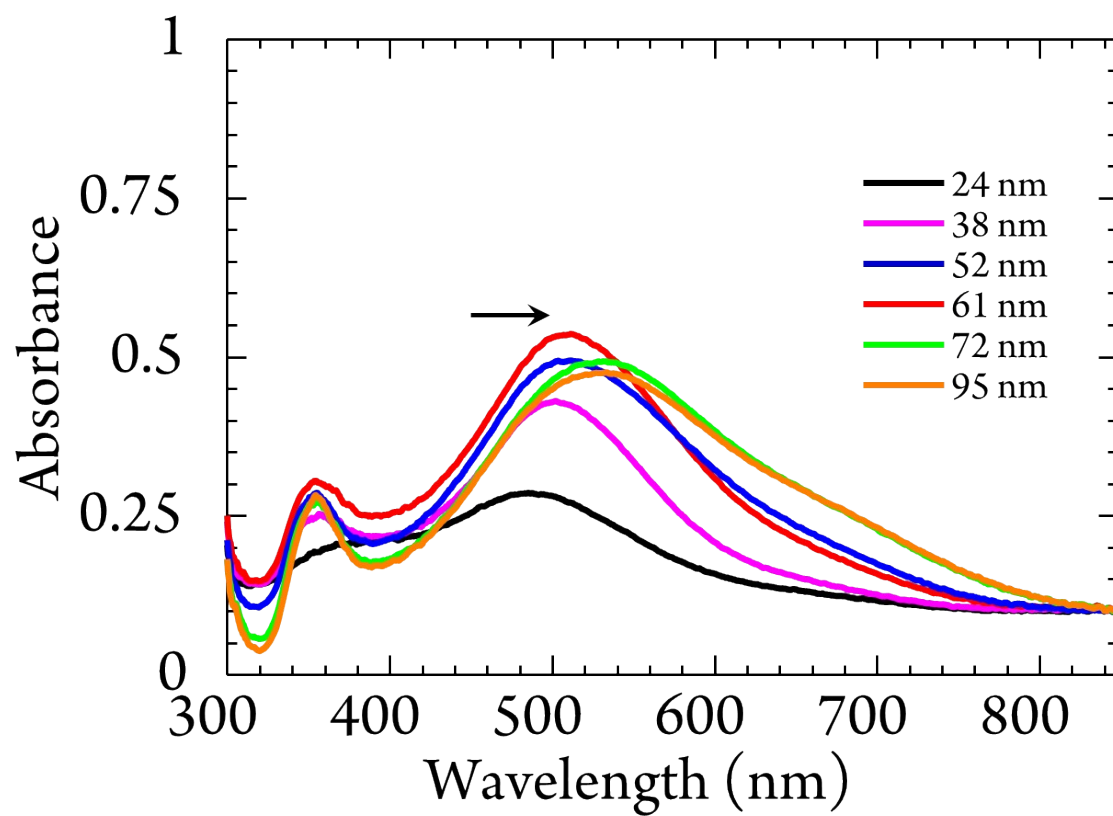

**Fig. S2** Absorption spectra of Ag NPs with an average size of (a) 24 nm, (b) 38 nm, (c) 52 nm, (d) 61 nm, (e) 72 nm, and (f) 95 nm grown on FTO substrate.
